# Supplementary material for: Familial t(1;11) translocation is associated with disruption of white matter structural integrity and oligodendrocyte–myelin dysfunction
Source: PubMed Central journal article supplement (PMC6814440; doi:10.1038/s41380-019-0505-2), 2019-09-03
Supplement: 41380_2019_505_MOESM3_ESM.pdf [file 41380_2019_505_MOESM3_ESM.pdf]

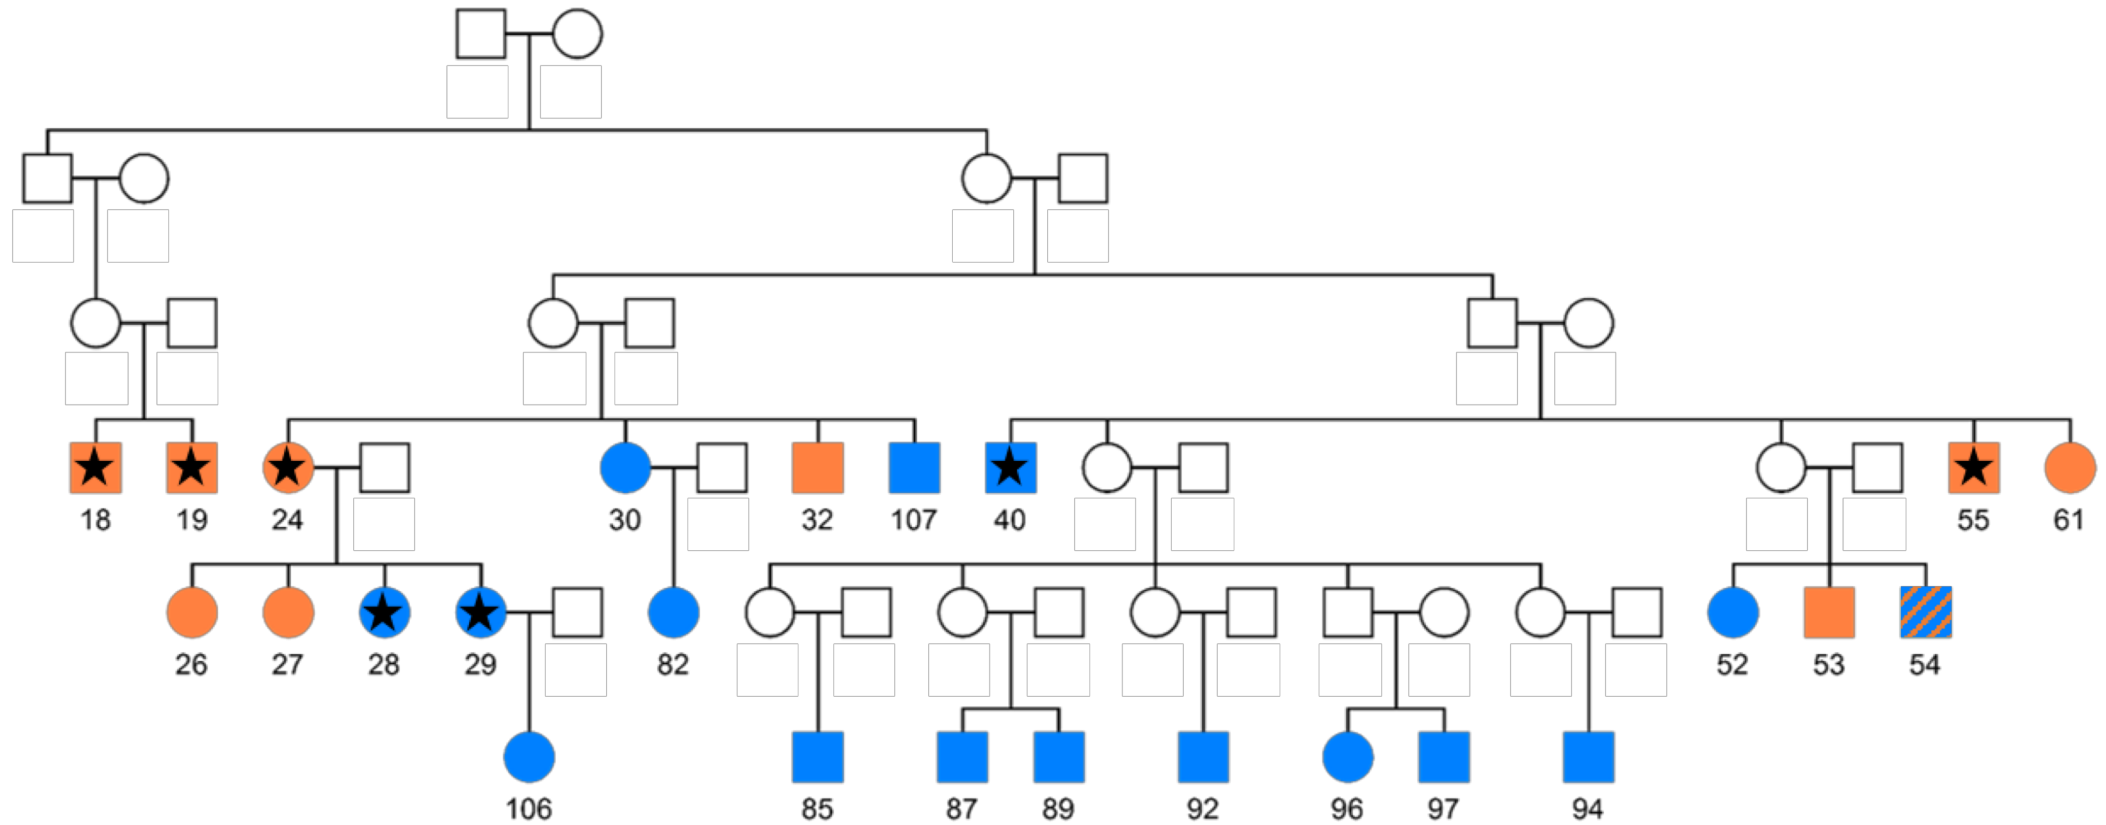

Key:

Orange= translocation carrier

Blue= translocation non-carrier

Cross-hatched blue-orange= affected non-carrier

Star= individuals from whom iPSC were derived for study
