# Supplementary material for: Familial t(1;11) translocation is associated with disruption of white matter structural integrity and oligodendrocyte–myelin dysfunction
Source: PubMed Central journal article supplement (PMC6814440; doi:10.1038/s41380-019-0505-2), 2019-09-03
Supplement: 41380_2019_505_MOESM4_ESM.pdf [file 41380_2019_505_MOESM4_ESM.pdf]

GLOBAL NETWORK DEGREE (WITHOUT Case4)

|             | POST. MEAN | LOWER<br>95% CI | UPPER<br>95% CI | EFF.SAMP | pMCMC          |
|-------------|------------|-----------------|-----------------|----------|----------------|
| (INTERCEPT) | 1.02438    | 0.36225         | 2.25510         | 3911     | 0.1216         |
| DIAGNOSIS   | -1.10485   | 2.16010         | -0.11928        | 8673     | <b>0.0353*</b> |
| AGE         | 0.01203    | -0.01651        | 0.04085         | 3394     | 0.3880         |

GLOBAL NETWORK STRENGTH (WITHOUT Case4)

|             | POST. MEAN | LOWER<br>95% CI | UPPER<br>95% CI | EFF.SAMP | pMCMC         |
|-------------|------------|-----------------|-----------------|----------|---------------|
| (INTERCEPT) | 1.630103   | 0.361645        | 2.942390        | 8054     | 0.0151        |
| DIAGNOSIS   | -0.925860  | -1.880168       | 0.124224        | 9000     | <b>0.0684</b> |
| AGE         | -0.009228  | -0.034927       | 0.016131        | 9338     | 0.4664        |
