# Supplementary material for: Familial t(1;11) translocation is associated with disruption of white matter structural integrity and oligodendrocyte–myelin dysfunction
Source: PubMed Central journal article supplement (PMC6814440; doi:10.1038/s41380-019-0505-2), 2019-09-03
Supplement: 41380_2019_505_MOESM5_ESM.pdf [file 41380_2019_505_MOESM5_ESM.pdf]

## COMPARISON OF dMRI OUTPUTS BETWEEN AFFECTED NON-CARRIER AND UNAFFECTED CONTROLS

### GLOBAL STRENGTH

|             | POST.MEAN | L-95% CI | U-95% CI | EFF.SAMP | pMCMC |
|-------------|-----------|----------|----------|----------|-------|
| (INTERCEPT) | 1.332515  | 4.057603 | 1.305672 | 6216     | 0.300 |
| DIAGNOSIS   | 1.466006  | 0.943506 | 3.895556 | 4287     | 0.206 |
| AGE         | 0.007346  | 0.043385 | 0.026525 | 9000     | 0.635 |

### GLOBAL DEGREE

|             | POST.MEAN | L-95% CI | U-95% CI | EFF.SAMP | pMCMC |
|-------------|-----------|----------|----------|----------|-------|
| (INTERCEPT) | -1.29842  | -3.82651 | 1.15863  | 5706     | 0.275 |
| DIAGNOSIS   | 0.48255   | -1.61269 | 2.71490  | 5002     | 0.623 |
| AGE         | 0.02338   | -0.00873 | 0.05693  | 9000     | 0.148 |

### CLUSTERING COEFFICIENT

|             | POST.MEAN | L-95% CI  | U-95% CI | EFF.SAMP | pMCMC  |
|-------------|-----------|-----------|----------|----------|--------|
| (INTERCEPT) | -1.240372 | -3.420873 | 1.085381 | 7379     | 0.2596 |
| DIAGNOSIS   | 1.892257  | -0.036190 | 3.867386 | 6388     | 0.0613 |
| AGE         | -0.023539 | -0.052909 | 0.007493 | 9000     | 0.1147 |

### GLOBAL EFFICIENCY

|             | POST.MEAN | L-95% CI  | U-95% CI | EFF.SAMP | pMCMC |
|-------------|-----------|-----------|----------|----------|-------|
| (INTERCEPT) | -0.569204 | -2.968351 | 1.939521 | 5980     | 0.609 |
| DIAGNOSIS   | 1.256684  | -0.791421 | 3.576169 | 4008     | 0.233 |
| AGE         | -0.023495 | -0.055236 | 0.008389 | 9000     | 0.142 |
