# Supplementary material for: Familial t(1;11) translocation is associated with disruption of white matter structural integrity and oligodendrocyte–myelin dysfunction
Source: PubMed Central journal article supplement (PMC6814440; doi:10.1038/s41380-019-0505-2), 2019-09-03
Supplement: 41380_2019_505_MOESM6_ESM.pdf [file 41380_2019_505_MOESM6_ESM.pdf]

**SUPPLEMENTARY TABLE 3: CASE DESCRIPTIONS AND CELL LINE IDs USED IN THIS STUDY**

| Subject   | Sex    | Diagnosis                       | t(1:11)<br>Translocation<br>status | Psychotropic<br>Medications (At time<br>of biopsy)   | AAO/AAS | Pedigree Reference<br>(Ryan et al., 2018) | Pedigree Reference<br>(Blackwood et al., 2001) |
|-----------|--------|---------------------------------|------------------------------------|------------------------------------------------------|---------|-------------------------------------------|------------------------------------------------|
| Control 1 | Male   | Unaffected                      | Non-Carrier                        | None                                                 | NA/73   | 40                                        | IV 15                                          |
| Control 2 | Female | Unaffected                      | Non-Carrier                        | None                                                 | NA/52   | 28                                        | not included*                                  |
| Control 3 | Female | Unaffected                      | Non-Carrier                        | None                                                 | NA/46   | 29                                        | not included*                                  |
| Case 1    | Male   | Cyclothymia                     | Carrier                            | None                                                 | 45/66   | 55                                        | not included*                                  |
| Case 2    | Male   | Major<br>Depressive<br>Disorder | Carrier                            | Fluoxetine                                           | 37/75   | 24                                        | IV 11                                          |
| Case 3    | Male   | Major<br>Depressive<br>Disorder | Carrier                            | Citalopram                                           | 39/58   | 19                                        | IV 9                                           |
| Case 4    | Male   | Schizophrenia                   | Carrier                            | Sodium valproate,<br>Clozapine, Lithium<br>Carbonate | 20/60   | 18                                        | IV 8                                           |

\* Not included in the pedigree in Blackwood et al., 2001
