# Supplementary material for: Familial t(1;11) translocation is associated with disruption of white matter structural integrity and oligodendrocyte–myelin dysfunction
Source: PubMed Central journal article supplement (PMC6814440; doi:10.1038/s41380-019-0505-2), 2019-09-03
Supplement: 41380_2019_505_MOESM7_ESM.pdf [file 41380_2019_505_MOESM7_ESM.pdf]

Supplementary Table 4: Comparison of ACTB mRNA levels across lines using RNA-seq and qPCR

|       | ACTB RNA-seq (FPKM) | ACTB qPCR (Ct) | GAPDH qPCR (Ct) |
|-------|---------------------|----------------|-----------------|
| Con1  | 863± 71             | 24.81± 0.77    | 24.50± 1.06     |
| Con2  | 984± 240            | 28.38± 1.8     | 25.86± 1.07     |
| Case2 | 1025± 175.2         | 23.12± 0.28    | 24.17± 0.11     |
| Case3 | 697±63.5            | 24.71±1.46     | 25.23± 1.23     |
| Case4 | 745±104.1           | 26.67±1.06     | 26.24± 0.83     |

NB: Measurements were carried out on 3 week oligodendrocyte cultures.

Average FPKM and average Ct values are shown for results derived from RNA-seq qPCR respectively
