# Supplementary material for: Familial t(1;11) translocation is associated with disruption of white matter structural integrity and oligodendrocyte–myelin dysfunction
Source: PubMed Central journal article supplement (PMC6814440; doi:10.1038/s41380-019-0505-2), 2019-09-03

a

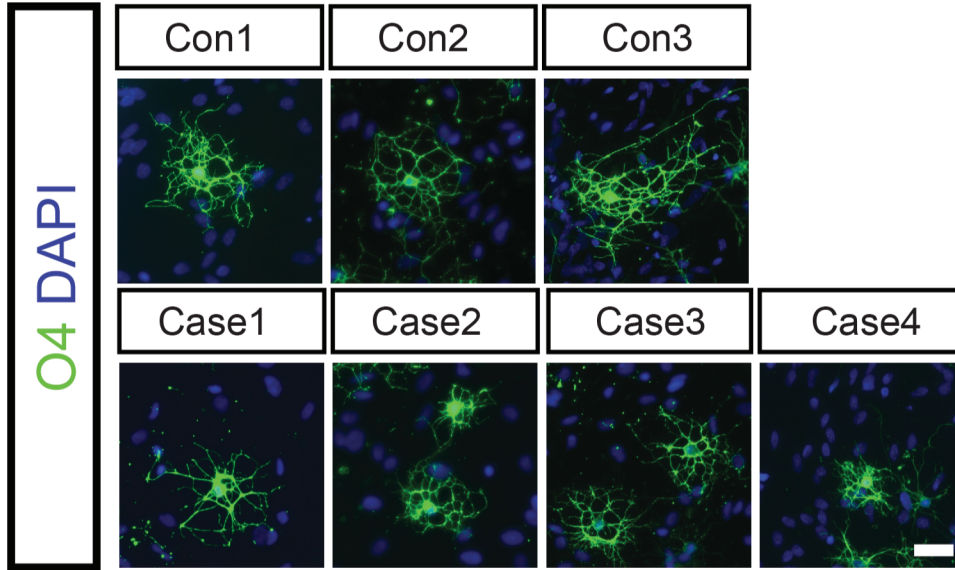

b

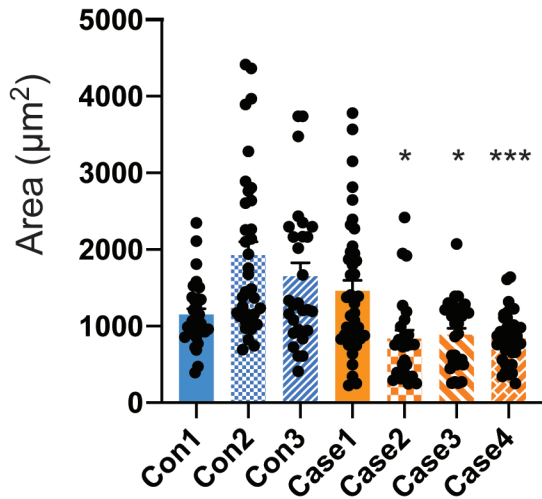

c

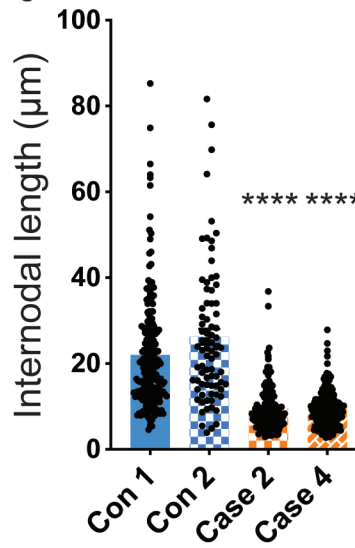

d

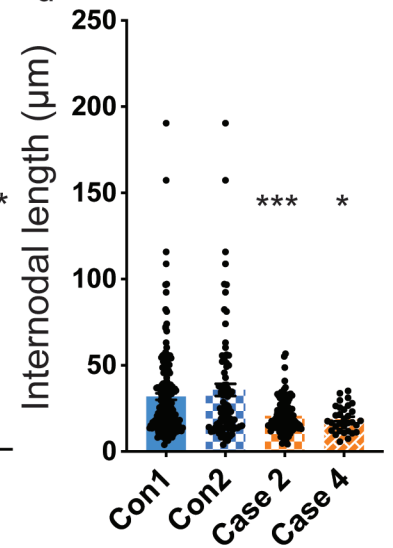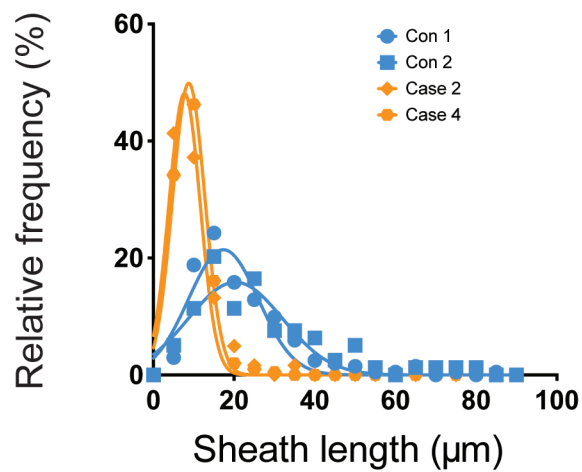

Supplement: 41380_2019_505_MOESM12_ESM.pdf [file 41380_2019_505_MOESM12_ESM.pdf]
